# Supplementary material
Source: publisher figshare collection journal article supplement (https://frontiersin.figshare.com/ndownloader/files/20021894)
Supplement: Supplementary file [file 20021894]

# Transcriptome analysis of EcN incubated with T4 phages for 2 h

## Material and methods

Extracted RNA was depleted of ribosomal RNA using the Ribo-Zero rRNA Removal Kit for bacteria (Illumina) according to the manual. Depleted RNA was fragmented for 3 min at 94°C using the NEBNext Magnesium RNA Fragmentation Module. The RNA ends were repaired with two consecutive T4 PNK incubations (-/+ ATP) and a RppH treatment. Library preparation was performed according to the NEBNext Multiplex Small RNA Library Preparation Guide for Illumina. All adapters and primers were diluted 1:4 and 15 and 16 cycles of PCR were used, respectively. No size selection was performed at the end of the protocol. 12 libraries were pooled and sequenced on a NextSeq 500 with a read length of 75 nt.

## Analysis of deep-sequencing data

The quality of raw reads (Phred scores, number of duplicates and adapter) were assessed using FastQC (version-0.11.31) (Andrews, 2010). In order to assure a high sequence quality, the Illumina reads in FASTQ format were trimmed with a cut-off phred score of 20 by cutadapt (version-1.15) (Martin, 2011) that also was used to remove the sequencing adapter sequences. The following steps were performed using the subcommand "create", "align" and "coverage" of the tool READemption (version-0.4.3)(Forstner et al., 2014) with default parameters. Reads with a length below 20nt were removed and the remaining reads were mapped to the reference genome sequences (NCBI Reference Sequence: NZ\_CP007799.1, [27 June 2014]) using segemehl (Hoffmann et al., 2009). Coverage plots in wiggle format representing the number of aligned reads per nucleotide were generated based on the aligned reads and visualized in the Integrated Genome Browser (Freese et al., 2016). Each graph was normalized to the total number of reads that could be aligned from the respective library. To restore the original data range and prevent rounding of small error to zero by genome browsers, each graph was then multiplied by the minimum number of mapped reads calculated over all libraries. The differentially expressed genes were identified using DESeq2 (version-1.16.1)(Love et al., 2014). In all cases, only genes with maximum Benjamini-Hochberg corrected p-value (padj) of 0.05, were classified as significantly differentially expressed. The data were represented as MA plots using R. The RNA-Seq data presented in this work has been deposited at the NCBI Gene Expression Omnibus (Edgar et al., 2002) and can be accessed through GEO series accession number GSE135946 (<https://www.ncbi.nlm.nih.gov/geo/query/acc.cgi?acc=GSE135946>).

The results of the transcriptome analysis are presented here in the sections table S1, figure S2, table S2 and table S3

**Table S1: Details of gene regulation in EcN incubated with T4 phages after 2 h when compared to EcN incubated in LB medium for 2 h**

|                                                                               |           |
|-------------------------------------------------------------------------------|-----------|
| Genes downregulated ( $\log_2\text{foldchange} < -2$ , $\text{padj} < 0.05$ ) | 123 genes |
| Genes upregulated ( $\log_2\text{foldchange} > 2$ , $\text{padj} < 0.05$ )    | 33 genes  |

**Figure S2: Donut graphs representing the functional grouping of the genes that were downregulated (i) with  $\log_2\text{foldchange} < -2$ ,  $\text{padj} < 0.05$  and upregulated (ii) with  $\log_2\text{foldchange} > 2$ ,  $\text{padj} < 0.05$  in EcN when incubated with T4 phages after 2 h. In the legend of the graph, the numbers in the bracket after the functional groups represents number of genes down or upregulated in the respective group.**

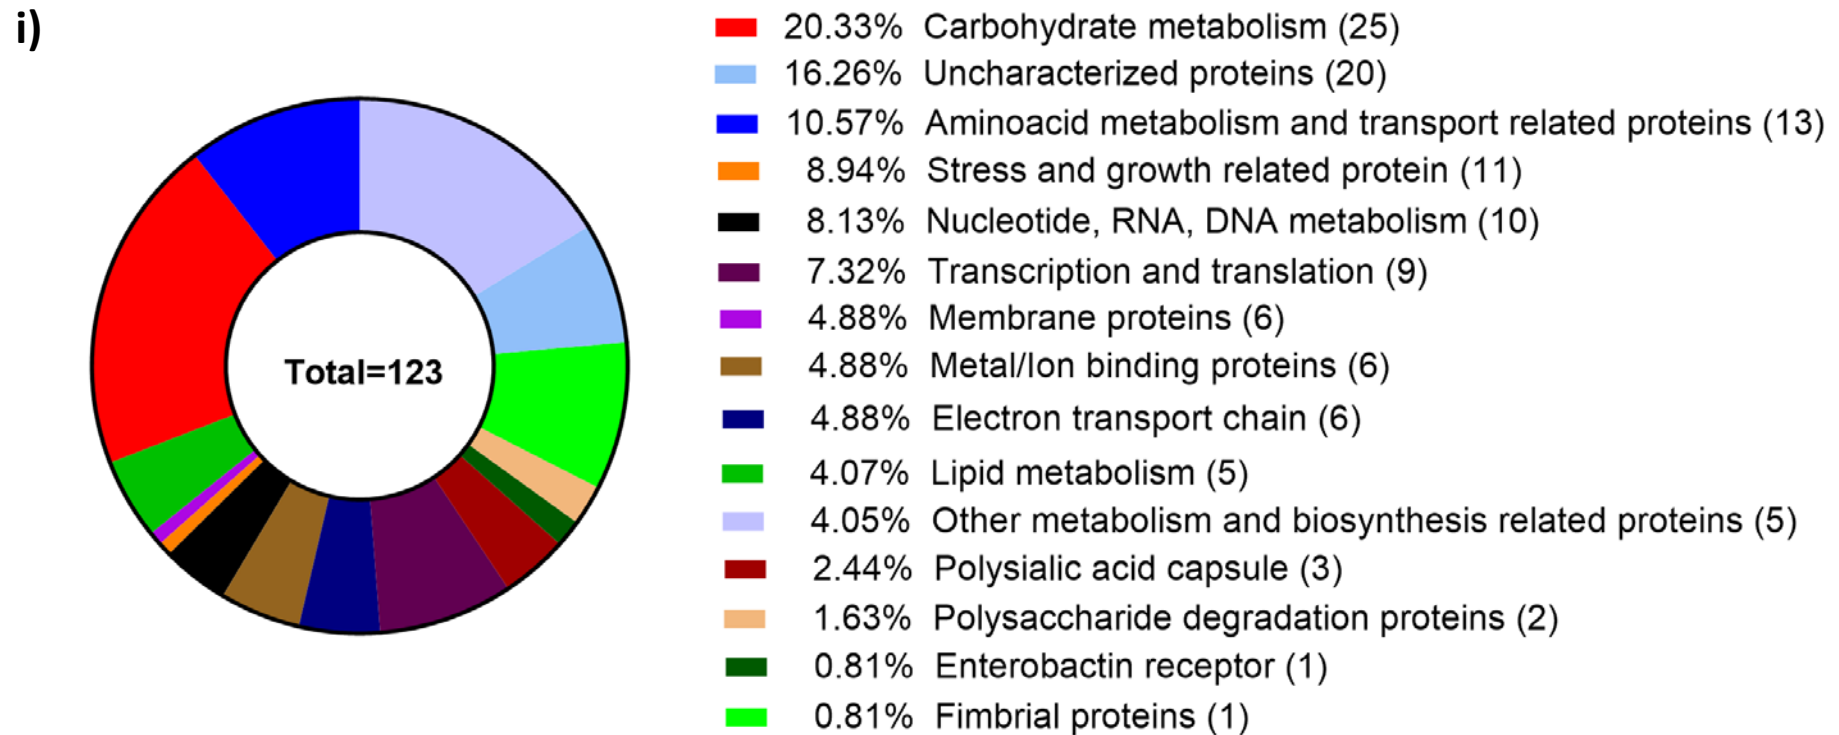

ii)

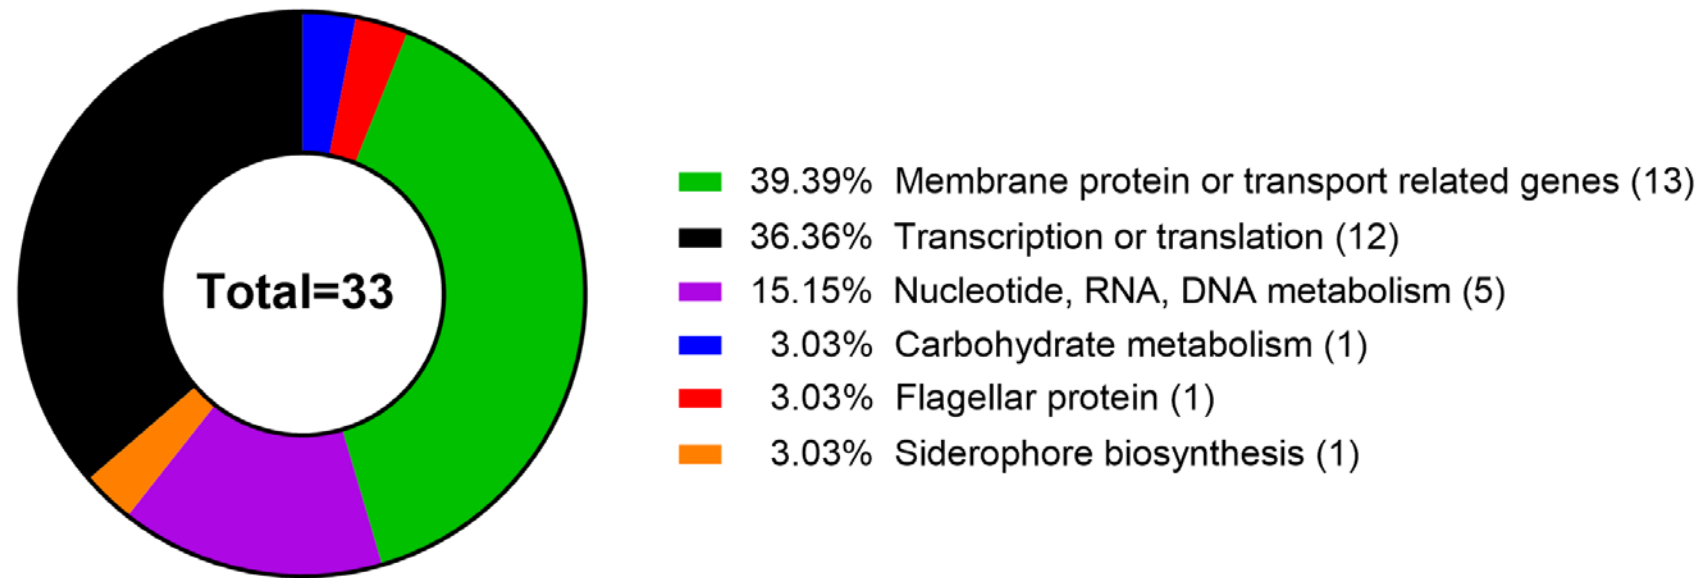

**Table S2: Details of the genes downregulated in EcN when incubated with T4 phages after 2 h ( $\log_2\text{foldchange} < -2$ ,  $\text{padj} < 0.05$ )**

| Downregulated genes | $\log_2\text{foldchange}$ | Functional prediction                                                                    | Functional group                                    |
|---------------------|---------------------------|------------------------------------------------------------------------------------------|-----------------------------------------------------|
| <b>EcN1917_4157</b> | -5,074                    | Tryptophan production                                                                    | Aminoacid metabolism and transport related          |
| <b>EcN1917_3127</b> | -5,035                    | Aspartate/ornithine carbamoyl transferase family protein<br>protein YgeW,                | Nucleotide, RNA, DNA metabolism                     |
| <b>EcN1917_1644</b> | -4,859                    | N-acetylgalactosamine 6-sulfate sulfatase (GALNS),<br>polysaccharide degradation protein | Polysaccharide degradation proteins                 |
| <b>EcN1917_4791</b> | -4,850                    | Uncharachetrised protein                                                                 | Uncharachetrised proteins                           |
| <b>EcN1917_4158</b> | -4,557                    | Tryptophan-specific transport protein                                                    | Aminoacid metabolism and transport related<br>genes |

|                     |        |                                                                                                     |                                                  |
|---------------------|--------|-----------------------------------------------------------------------------------------------------|--------------------------------------------------|
| <b>EcN1917_4896</b> | -4,312 | N-acetylneuraminic acid outer membrane channel protein NanC                                         | Membrane proteins                                |
| <b>EcN1917_3113</b> | -4,098 | Diaminopimelate decarboxylase (EC 4.1.1.20), amino acid biosynthesis                                | Aminoacid metabolism and transport related genes |
| <b>EcN1917_3447</b> | -4,033 | Glycogen synthesis protein GlgS , glycogen synthesis                                                | Carbohydrate metabolism                          |
| <b>EcN1917_3135</b> | -3,953 | Predicted oxidoreductase 2C Fe-S subunit, membrane proteins                                         | Membrane proteins                                |
| <b>EcN1917_3128</b> | -3,945 | Diaminopropionate ammonia-lyase (EC 4.3.1.15), amino acid metabolism                                | Aminoacid metabolism and transport related genes |
| <b>EcN1917_4920</b> | -3,898 | Uncharacterised protein                                                                             | Uncharacterised proteins                         |
| <b>EcN1917_4483</b> | -3,787 | Zinc resistance associated protein, stress related protein                                          | Stress related proteins                          |
| <b>EcN1917_2521</b> | -3,762 | Acetyl-CoA:acetoacetyl-CoA transferase 2C alpha subunit (EC 2.8.3.8), lipid/fatty acid metabolism   | Lipid metabolism                                 |
| <b>EcN1917_3136</b> | -3,752 | SsnA protein, metal/ion binding                                                                     | Metal/ion binding                                |
| <b>EcN1917_3523</b> | -3,710 | Uncharacterised protein                                                                             | Uncharacterised proteins                         |
| <b>EcN1917_2441</b> | -3,598 | Pseudouridine 5'-phosphate glycosidase, nucleotide metabolism                                       | Nucleotide, RNA, DNA metabolism                  |
| <b>EcN1917_1574</b> | -3,590 | YdcH protein , uncharacterised protein                                                              | Uncharacterised proteins                         |
| <b>EcN1917_0001</b> | -3,586 | Aspartokinase (EC 2.7.2.4) / homoserine dehydrogenase (EC 1.1.1.3), homoserine biosynthetic process | Aminoacid metabolism and transport related genes |
| <b>EcN1917_2442</b> | -3,512 | Pseudouridine kinase (EC 2.7.1.83), nucleotide metabolism                                           | Nucleotide, RNA, DNA metabolism                  |
| <b>EcN1917_3129</b> | -3,436 | Putative deacetylase YgeY, metal/ion binding                                                        | Metal/ion binding                                |
| <b>EcN1917_2543</b> | -3,428 | Uncharacterised protein                                                                             | Uncharacterised protein                          |

|                     |        |                                                                                                                                       |                                                  |
|---------------------|--------|---------------------------------------------------------------------------------------------------------------------------------------|--------------------------------------------------|
| <b>EcN1917_3133</b> | -3,386 | Accessory protein YqeC in selenium-dependent molybdenum hydroxylase maturation, transcription and translation                         | Transcription and translation                    |
| <b>EcN1917_3137</b> | -3,344 | Uncharacterised protein YgfM                                                                                                          | Uncharacterised protein                          |
| <b>EcN1917_2868</b> | -3,250 | Ribosome hibernation protein YfiA, translation                                                                                        | Transcription and translation                    |
| <b>EcN1917_3072</b> | -3,210 | Type 6 secretion system tube protein                                                                                                  | Membrane proteins                                |
| <b>EcN1917_2542</b> | -3,175 | Anaerobic glycerol-3-phosphate dehydrogenase subunit C (EC 1.1.5.3), electron transport chain                                         | Electron transport chain                         |
| <b>EcN1917_4488</b> | -3,074 | Translation elongation factor Tu                                                                                                      | Transcription and translation                    |
| <b>EcN1917_4482</b> | -3,045 | Zinc resistance-associated protein, stress related protein                                                                            | Stress related proteins                          |
| <b>EcN1917_4723</b> | -3,040 | Possible membrane protein                                                                                                             | Membrane proteins                                |
| <b>EcN1917_1544</b> | -3,032 | Universal stress protein F                                                                                                            | Stress related proteins                          |
| <b>EcN1917_2652</b> | -3,012 | D-serine permease DsdX, D-serine transport                                                                                            | Aminoacid metabolism and transport related genes |
| <b>EcN1917_1383</b> | -2,981 | Uncharacterised protein                                                                                                               | Uncharacterised protein                          |
| <b>EcN1917_0003</b> | -2,971 | Threonine synthase (EC 4.2.3.1), threonine biosynthetic process                                                                       | Aminoacid metabolism and transport related genes |
| <b>EcN1917_3134</b> | -2,966 | CTP:molybdopterin cytidylyltransferase , translation                                                                                  | Transcription and translation                    |
| <b>EcN1917_2538</b> | -2,940 | Glycerophosphoryl diester phosphodiesterase 2C periplasmic, lipid metabolism                                                          | Lipid metabolism                                 |
| <b>EcN1917_4895</b> | -2,931 | Sialic acid-induced transmembrane protein YjhT(NanM) 2C possible mutarotase, polysialicacid capsule metabolism                        | Polysialicacid capsule                           |
| <b>EcN1917_2426</b> | -2,924 | Galactose/methyl galactoside ABC transport system 2C D-galactose-binding periplasmic protein MglB (TC 3.A.1.2.3), galactose transport | Carbohydrate metabolism                          |

|                     |        |                                                                                                            |                                                     |
|---------------------|--------|------------------------------------------------------------------------------------------------------------|-----------------------------------------------------|
| <b>EcN1917_2540</b> | -2,904 | Anaerobic glycerol-3-phosphate dehydrogenase subunit A (EC 1.1.5.3), lipid metabolism                      | Lipid metabolism                                    |
| <b>EcN1917_3610</b> | -2,898 | Putative sugar isomerase involved in processing of exogenous sialic acid, polysialicacid capsule metabolim | Polysialicacid capsule                              |
| <b>EcN1917_2423</b> | -2,891 | Uncharacterised protein                                                                                    | Uncharachterised protein                            |
| <b>EcN1917_0906</b> | -2,883 | Cold shock protein CspD                                                                                    | Stress related protein                              |
| <b>EcN1917_1643</b> | -2,881 | GALNS arylsulfatase regulator (Fe-S oxidoreductase), metal/ion binding                                     | Metal/ion binding                                   |
| <b>EcN1917_3138</b> | -2,857 | Possible hypoxanthine oxidase XdhD, purine nucleobase metabolic process                                    | Nucleotide, RNA, DNA metabolism                     |
| <b>EcN1917_0002</b> | -2,839 | Homoserine kinase (EC 2.7.1.39), threonine biosynthetic process                                            | Aminoacid metabolism and transport related genes    |
| <b>EcN1917_0616</b> | -2,808 | Enterobactin receptor protein                                                                              | Enterobactin receptor                               |
| <b>EcN1917_0651</b> | -2,795 | Citrate [pro-3S]-lyase] ligase (EC 6.2.1.22), involved in biosynthetic process                             | Other metabolism and biosynthesis related proteins  |
| <b>EcN1917_3664</b> | -2,784 | Uncharacterised protein                                                                                    | Uncharachterised protein                            |
| <b>EcN1917_4722</b> | -2,772 | Putative Uncharacterised protein YjfN                                                                      | Uncharachterised protein                            |
| <b>EcN1917_4790</b> | -2,735 | Arginine deiminase (EC 3.5.3.6), arginine metabolic process                                                | Aminoacid metabolism and transport related genes    |
| <b>EcN1917_1048</b> | -2,730 | Galactosamine-6-phosphate isomerase, glycolysis                                                            | Carbohydrate metabolism and transport related genes |
| <b>EcN1917_2440</b> | -2,729 | Inner membrane transport protein YeiM 2C in cluster with pseudouridine metabolism operon, RNA metabolism   | Nucleotide, RNA, DNA metabolism                     |
| <b>EcN1917_1014</b> | -2,658 | Uncharacterised protein                                                                                    | Uncharachterised protein                            |

|                     |        |                                                                                        |                                                     |
|---------------------|--------|----------------------------------------------------------------------------------------|-----------------------------------------------------|
| <b>EcN1917_4789</b> | -2,634 | Carbamate kinase (EC 2.7.2.2), arginine metabolic process                              | Aminoacid metabolism and transport related genes    |
| <b>EcN1917_2539</b> | -2,629 | Glycerol-3-phosphate transporter, glycolysis                                           | Carbohydrate metabolism and transport related genes |
| <b>EcN1917_2541</b> | -2,624 | Anaerobic glycerol-3-phosphate dehydrogenase subunit B (EC 1.1.5.3), lipid metabolism  | Lipid metabolism                                    |
| <b>EcN1917_0062</b> | -2,617 | L-ribulose-5-phosphate 4-epimerase (EC 5.1.3.4), carbohydrate metabolism               | Carbohydrate metabolism and transport related genes |
| <b>EcN1917_2421</b> | -2,616 | Pyridine nucleotide-disulphide oxidoreductase family protein, electron transport chain | Electron transport chain                            |
| <b>EcN1917_0407</b> | -2,593 | Threonine efflux protein,                                                              | Aminoacid metabolism and transport related genes    |
| <b>EcN1917_0417</b> | -2,592 | Galactoside O-acetyltransferase, lactose biosynthesis                                  | Carbohydrate metabolism                             |
| <b>EcN1917_0035</b> | -2,577 | Transcriptional activatory protein CaiF, transcription                                 | Transcription and translation                       |
| <b>EcN1917_2813</b> | -2,577 | Stationary phase inducible protein CsiE, stress/ growth related protein                | Stress related protein                              |
| <b>EcN1917_4398</b> | -2,554 | Glycerol uptake facilitator protein, glycerol transport                                | Carbohydrate metabolism                             |
| <b>EcN1917_2653</b> | -2,552 | D-serine dehydratase (EC 4.3.1.18), D-serine metabolism                                | Aminoacid metabolism and transport related genes    |
| <b>EcN1917_2422</b> | -2,528 | Dihydropyrimidine dehydrogenase [NADP+] (EC 1.3.1.2), nucleotide metabolism            | Nucleotide, RNA, DNA metabolism                     |
| <b>EcN1917_2537</b> | -2,521 | Protein inaA, stress related protein                                                   | Stress related protein                              |
| <b>EcN1917_0753</b> | -2,518 | Uncharacterised protein                                                                | Uncharacterised protein                             |
| <b>EcN1917_4134</b> | -2,512 | Heat shock protein, stress related protein                                             | Stress related protein                              |
| <b>EcN1917_0275</b> | -2,483 | Uncharacterised protein                                                                | Uncharacterised protein                             |

|                     |        |                                                                                        |                                                     |
|---------------------|--------|----------------------------------------------------------------------------------------|-----------------------------------------------------|
| <b>EcN1917_2958</b> | -2,479 | tRNA metabolism, translation                                                           | Transcription and translation                       |
| <b>EcN1917_3520</b> | -2,474 | D-glucarate catabolic process                                                          | Carbohydrate metabolism                             |
| <b>EcN1917_3521</b> | -2,464 | 2-hydroxy-3-oxopropionate reductase (EC 1.1.1.60), glyoxylate metabolic process        | Carbohydrate metabolism                             |
| <b>EcN1917_3132</b> | -2,446 | Selenium-dependent molybdenum hydroxylase system protein YqeB, transcription           | Transcription and translation                       |
| <b>EcN1917_3019</b> | -2,445 | Uncharacterised protein                                                                | Uncharacterised protein                             |
| <b>EcN1917_3517</b> | -2,419 | Threonine catabolic operon transcriptional activator TdcA, transcription               | Transcription and translation                       |
| <b>EcN1917_0631</b> | -2,417 | Carbon starvation protein A, stress related protein                                    | Stress related protein                              |
| <b>EcN1917_2252</b> | -2,414 | Uncharacterised protein                                                                | Uncharacterised protein                             |
| <b>EcN1917_2519</b> | -2,398 | Sensory histidine kinase AtoS, membrane protein                                        | Membrane protein                                    |
| <b>EcN1917_1013</b> | -2,392 | Glucose-1-phosphatase (EC 3.1.3.10), glycolysis                                        | Carbohydrate metabolism and transport related genes |
| <b>EcN1917_0063</b> | -2,374 | L-arabinose isomerase (EC 5.3.1.4), carbohydrate metabolism a                          | Carbohydrate metabolism and transport related genes |
| <b>EcN1917_0675</b> | -2,373 | Uncharacterised protein                                                                | Uncharacterised protein                             |
| <b>EcN1917_4649</b> | -2,349 | Melibiose operon regulatory protein, transcription                                     | Transcription and translation                       |
| <b>EcN1917_2271</b> | -2,340 | Uncharacterised protein                                                                | Uncharacterised protein                             |
| <b>EcN1917_2741</b> | -2,337 | Ethanolamine utilization polyhedral-body-like protein EutS, polysaccharide degradation | Polysaccharide degradation proteins                 |
| <b>EcN1917_3131</b> | -2,320 | Carbamate kinase-like protein YqeA                                                     | Aminoacid metabolism and transport related genes    |
| <b>EcN1917_4397</b> | -2,314 | Glycerol kinase (EC 2.7.1.30)                                                          | Lipid metabolism                                    |
| <b>EcN1917_1015</b> | -2,307 | Flavoprotein WrbA, stress related protein                                              | Stress related protein                              |



|                     |        |                                                                                                                |                                                    |
|---------------------|--------|----------------------------------------------------------------------------------------------------------------|----------------------------------------------------|
| <b>EcN1917_3613</b> | -2,306 | Sialic acid transporter (permease) NanT, polysialicacid capsule metabolism                                     | Polysialicacid capsule metabolism                  |
| <b>EcN1917_1387</b> | -2,304 | Phosphoenolpyruvate-dihydroxyacetone phosphotransferase (EC 2.7.1.121), glycolysis                             | Carbohydrate metabolism                            |
| <b>EcN1917_2438</b> | -2,303 | Inosine-uridine preferring nucleoside hydrolase (EC 3.2.2.1), metal binding in metabolic process               | Metal/ion binding                                  |
| <b>EcN1917_0298</b> | -2,300 | putative membrane protein                                                                                      | Membrane protein                                   |
| <b>EcN1917_0646</b> | -2,292 | 2-(5"-triphosphoribosyl)-3'-dephosphocoenzyme- A synthase (EC 2.7.8.25), prosthetic group biosynthetic process | Other metabolism and biosynthesis related proteins |
| <b>EcN1917_2096</b> | -2,271 | Uncharacterised protein                                                                                        | Uncharacterised protein                            |
| <b>EcN1917_1786</b> | -2,266 | putative oxidoreductase 2C Fe-S subunit, metal/ion binding                                                     | Metal/ion binding                                  |
| <b>EcN1917_3528</b> | -2,260 | Tagatose-6-phosphate kinase AgaZ (EC 2.7.1.144), galactitol metabolic process                                  | Carbohydrate metabolism                            |
| <b>EcN1917_1839</b> | -2,255 | Ribulosamine/erythrulosamine 3-kinase potentially involved in protein deglycation                              | Carbohydrate metabolism                            |
| <b>EcN1917_3144</b> | -2,246 | Xanthine permease, involved in metabolic processes                                                             | Other metabolism and biosynthesis related proteins |
| <b>EcN1917_3524</b> | -2,228 | D-galactarate dehydratase (EC 4.2.1.42), carbohydrate metabolism                                               | Carbohydrate metabolism                            |
| <b>EcN1917_3126</b> | -2,227 | Uncharacterised sigma-54-dependent transcriptional regulator YgeV, transcription                               | Transcription and translation                      |
| <b>EcN1917_3614</b> | -2,224 | N-acetylneuraminate lyase (EC 4.1.3.3), carbohydrate metabolism                                                | Carbohydrate metabolism                            |
| <b>EcN1917_1597</b> | -2,202 | Transcriptional regulator 2C GntR family, transcription                                                        | Transcription and translation                      |

|                     |        |                                                                                              |                                 |
|---------------------|--------|----------------------------------------------------------------------------------------------|---------------------------------|
| <b>EcN1917_3048</b> | -2,201 | L-fucose phosphate aldolase (EC 4.1.2.17), carbohydrate metabolism                           | Carbohydrate metabolism         |
| <b>EcN1917_3124</b> | -2,188 | Xanthine dehydrogenase 2C FAD binding subunit (EC 1.17.1.4), nucleotide metabolism           | Nucleotide, RNA, DNA metabolism |
| <b>EcN1917_3388</b> | -2,176 | Predicted oxidoreductases (related to aryl-alcohol dehydrogenases), electron transport chain | Electron transport chain        |
| <b>EcN1917_2073</b> | -2,166 | Ferritin-like protein 2, metal binding                                                       | Metal/ion binding               |
| <b>EcN1917_3612</b> | -2,158 | N-acetylmannosamine-6-phosphate 2-epimerase (EC 5.1.3.9), carbohydrate metabolism            | Carbohydrate metabolism         |
| <b>EcN1917_2072</b> | -2,148 | L-arabinose-binding periplasmic protein precursor AraF (TC 3.A.1.2.2), L-arabinose transport | Carbohydrate metabolism         |
| <b>EcN1917_3935</b> | -2,137 | Cytochrome c551 peroxidase (EC 1.11.1.5), electron transport chain                           | Electron transport chain        |
| <b>EcN1917_1556</b> | -2,121 | Aldo-keto reductase, electron transport chain                                                | Electron transport chain        |
| <b>EcN1917_3925</b> | -2,120 | Chaperone HdeB, acid stress                                                                  | Stress related protein          |
| <b>EcN1917_3926</b> | -2,115 | Chaperone HdeA, acid stress                                                                  | Stress related protein          |
| <b>EcN1917_3130</b> | -2,097 | Dihydropyrimidinase (EC 3.5.2.2), metal/ion binding                                          | Metal/ion binding               |
| <b>EcN1917_1384</b> | -2,096 | Uncharacterised protein                                                                      | Uncharacterised protein         |
| <b>EcN1917_0030</b> | -2,090 | Uncharacterised protein                                                                      | Uncharacterised protein         |
| <b>EcN1917_1613</b> | -2,089 | mobile element protein                                                                       | Uncharacterised protein         |
| <b>EcN1917_4609</b> | -2,087 | Uncharacterised protein                                                                      | Uncharacterised protein         |
| <b>EcN1917_3830</b> | -2,078 | Fimbrial protein                                                                             | Fimbrial protein                |
| <b>EcN1917_0442</b> | -2,067 | Putative inner membrane protein                                                              | Membrane protein                |
| <b>EcN1917_2824</b> | -2,059 | Uncharacterised protein                                                                      | Uncharacterised protein         |
| <b>EcN1917_4889</b> | -2,039 | Uncharacterised protein                                                                      | Uncharacterised protein         |

|                     |        |                                                                                                                         |                                 |
|---------------------|--------|-------------------------------------------------------------------------------------------------------------------------|---------------------------------|
| <b>EcN1917_2425</b> | -2,038 | Galactose/methyl galactoside ABC transport system 2C ATP-binding protein MglA (EC 3.6.3.17), galactose transport system | Carbohydrate metabolism         |
| <b>EcN1917_0632</b> | -2,032 | Hypothetical small protein yjiX /replicative DNA helicase, DNA metabolism                                               | Nucleotide, RNA, DNA metabolism |
| <b>EcN1917_3522</b> | -2,029 | D-glucarate permease, carbohydrate metabolism and transport related genes                                               | Carbohydrate metabolism         |
| <b>EcN1917_3534</b> | -2,017 | Galactosamine-6-phosphate isomerase, carbohydrate metabolism                                                            | Carbohydrate metabolism         |

**Table S3: Details of the genes upregulated in EcN when incubated with T4 phages after 2 h (log<sub>2</sub>foldchange>2, padj<0.05)**

| <b>Upregulated genes</b> | <b>log<sub>2</sub>foldchange</b> | <b>Functional prediction</b>                                  | <b>Functional group</b>                     |
|--------------------------|----------------------------------|---------------------------------------------------------------|---------------------------------------------|
| <b>EcN1917_1772</b>      | 4,9758                           | Putative transport protein                                    | Membrane protein or transport related genes |
| <b>EcN1917_3763</b>      | 3,4163                           | TsgA protein homolog, involved in transmembrane transport     | Membrane protein or transport related genes |
| <b>EcN1917_4067</b>      | 2,7274                           | Putative inner membrane protein                               | Membrane protein or transport related genes |
| <b>EcN1917_2418</b>      | 2,6690                           | Cytidine deaminase, nucleoside metabolism                     | Nucleotide, RNA, DNA metabolism             |
| <b>EcN1917_2679</b>      | 2,6261                           | Nucleoside permease NupC, nucleotide transport                | Nucleotide, RNA, DNA metabolism             |
| <b>EcN1917_3557</b>      | 2,5741                           | DEAD-box ATP-dependent RNA helicase CshA, ribosome biogenesis | Transcription or translation                |

|                     |        |                                                                                                     |                                             |
|---------------------|--------|-----------------------------------------------------------------------------------------------------|---------------------------------------------|
| <b>EcN1917_0131</b> | 2,5133 | PQQ-dependent glucose dehydrogenase (EC 1.1.5.2),<br>pentose phosphate pathway                      | Carbohydrate metabolism                     |
| <b>EcN1917_4569</b> | 2,4706 | YjcB protein, membrane protein                                                                      | Membrane protein or transport related genes |
| <b>EcN1917_1507</b> | 2,4084 | ABC-type sugar transport system periplasmic binding<br>protein YcjN                                 | Membrane protein or transport related genes |
| <b>EcN1917_2337</b> | 2,4051 | Polysaccharide export lipoprotein Wza, LPS synthesis                                                | Membrane protein or transport related genes |
| <b>EcN1917_4973</b> | 2,4040 | Thymidine phosphorylase (EC 2.4.2.4), nucleoside<br>metabolism                                      | Nucleotide, RNA, DNA metabolism             |
| <b>EcN1917_1631</b> | 2,3324 | Bdm protein, positive regulation of bacterial-type<br>flagellum assembly                            | Flagella protein                            |
| <b>EcN1917_4972</b> | 2,2810 | Deoxyribose-phosphate aldolase (EC 4.1.2.4), involved in<br>deoxyribose phosphate catabolic process | Nucleotide, RNA, DNA metabolism             |
| <b>EcN1917_0626</b> | 2,2317 | Isochorismate synthase (EC 5.4.4.2), siderophore<br>biosynthesis                                    | Siderophore biosynthesis                    |
| <b>EcN1917_0474</b> | 2,2233 | Nucleoside-specific channel-forming protein Tsx precursor                                           | Nucleotide, RNA, DNA metabolism             |
| <b>EcN1917_3698</b> | 2,1533 | LSU ribosomal protein L15p (L27Ae)                                                                  | Transcription or translation                |
| <b>EcN1917_2278</b> | 2,1440 | Putrescine importer                                                                                 | Membrane protein or transport related genes |
| <b>EcN1917_3978</b> | 2,1340 | Outer membrane protein A precursor                                                                  | Membrane protein or transport related genes |
| <b>EcN1917_4843</b> | 2,1094 | LysR family transcriptional regulator                                                               | Transcription or translation                |

|                     |        |                                                                                     |                                             |
|---------------------|--------|-------------------------------------------------------------------------------------|---------------------------------------------|
| <b>EcN1917_1516</b> | 2,0761 | Outer membrane protein G precursor                                                  | Membrane protein or transport related genes |
| <b>EcN1917_1275</b> | 2,0746 | Spermidine putrescine ABC transporter permease component PotB                       | Membrane protein or transport related genes |
| <b>EcN1917_3579</b> | 2,0602 | Permease of the drug/metabolite transporter (DMT) superfamily                       | Membrane protein or transport related genes |
| <b>EcN1917_0624</b> | 2,0518 | Enterobactin exporter EntS                                                          | Membrane protein or transport related genes |
| <b>EcN1917_0059</b> | 2,0513 | Ribosomal large subunit pseudo-uridine synthase A                                   | Transcription or translation                |
| <b>EcN1917_3693</b> | 2,0468 | SSU ribosomal protein S4p (S9e)                                                     | Transcription or translation                |
| <b>EcN1917_3710</b> | 2,0467 | LSU ribosomal protein L16p (L10e)                                                   | Transcription or translation                |
| <b>EcN1917_3657</b> | 2,0434 | DNA-binding protein Fis                                                             | Transcription or translation                |
| <b>EcN1917_0936</b> | 2,0347 | SSU ribosomal protein S1p                                                           | Transcription or translation                |
| <b>EcN1917_3709</b> | 2,0342 | LSU ribosomal protein L29p (L35e)                                                   | Transcription or translation                |
| <b>EcN1917_3697</b> | 2,0294 | Preprotein translocase <i>secY</i> subunit, secretory pathway                       | Membrane protein or transport related genes |
| <b>EcN1917_1625</b> | 2,0177 | Formate dehydrogenase O beta subunit (EC 1.2.1.2), electron carrier activity        | Transcription or translation                |
| <b>EcN1917_3692</b> | 2,0050 | DNA-directed RNA polymerase alpha subunit (EC 2.7.7.6), DNA templated transcription | Transcription or translation                |
| <b>EcN1917_0821</b> | 2,0030 | ATP-dependent RNA helicase RhIE, ribosome assembly                                  | Transcription or translation                |

## References:

1. Andrews, S. (2010). FastQC: a quality control tool for high throughput sequence data. .
2. Edgar, R., Domrachev, M., and Lash, A.E. (2002). Gene Expression Omnibus: NCBI gene expression and hybridization array data repository. *Nucleic Acids Res* 30, 207-210.
3. Forstner, K.U., Vogel, J., and Sharma, C.M. (2014). READemption-a tool for the computational analysis of deep-sequencing-based transcriptome data. *Bioinformatics* 30, 3421-3423.
4. Freese, N.H., Norris, D.C., and Loraine, A.E. (2016). Integrated genome browser: visual analytics platform for genomics. *Bioinformatics* 32, 2089-2095.
5. Hoffmann, S., Otto, C., Kurtz, S., Sharma, C.M., Khaitovich, P., Vogel, J., Stadler, P.F., and Hackermuller, J. (2009). Fast mapping of short sequences with mismatches, insertions and deletions using index structures. *PLoS Comput Biol* 5, e1000502.
6. Love, M.I., Huber, W., and Anders, S. (2014). Moderated estimation of fold change and dispersion for RNA-seq data with DESeq2. *Genome Biol* 15, 550.
7. Martin, M. (2011). Cutadapt removes adapter sequences from high-throughput sequencing reads. *EMBnet.Journal*, 17, 3.
